# Supplementary material for: The Potential of Magnolia spp. in the Production of Alternative Pest Control Substances
Source: MDPI journal article supplement (doi:10.3390/molecules28124681), 2023-06-09
Supplement: s1 [file s1]

Table S1. Compounds identified on *Magnolia*'s fruit parts (Source: [39,46,47,51,52,54–68]).

| Compound                                                                                                                                 | Plant Structure |       |      |                   |
|------------------------------------------------------------------------------------------------------------------------------------------|-----------------|-------|------|-------------------|
|                                                                                                                                          | Peel            | Fruit | Seed | Sarcotesta (aril) |
| (-)-spathulenol                                                                                                                          | X               |       |      |                   |
| (-)-trans-pino-carvylacetate                                                                                                             | X               |       |      |                   |
| (1-2)- $\beta$ -D-allopyranoside                                                                                                         |                 | X     |      |                   |
| (3S,3aS,8S,9aS,10aR,10bS,E)-8-hydroxy-3,6,9a-trimethyl-3a,4,5,8,9,9a,10a,10b-octahydrooxireno[2',3':9,10]cyclodeca[1,2-b]furan-2(3H)-one |                 | X     |      |                   |
| (5 $\beta$ , 7 $\beta$ , 7 $\beta$ )-3, 11, eudesmadien-2-one                                                                            |                 |       | X    |                   |
| (E)-nerolidol                                                                                                                            | X               | X     | X    |                   |
| (E)- $\alpha$ -bisabolene                                                                                                                | X               | X     |      |                   |
| (E)- $\beta$ -farnesene                                                                                                                  |                 | X     |      |                   |
| (E)- $\gamma$ -bisabolene                                                                                                                |                 |       | X    |                   |
| (Z)-2-hydroxy-1-(hydroxymethyl)-9-octadecenoic acid ethyl ester                                                                          |                 |       | X    |                   |
| 1-(4-isopropylbenzyl)-1,3-dihydro-2H-benzo[d5,5'-diallyl-2'-methoxy-[1,1'-biphenyl]-2-ol]imidazol-2-one                                  |                 | X     |      |                   |
| 1-decanol                                                                                                                                |                 | X     |      |                   |
| 1-heptanol                                                                                                                               |                 | X     |      |                   |
| 1-hexadecanol                                                                                                                            |                 | X     |      |                   |
| 1-octadecanol                                                                                                                            |                 | X     |      |                   |
| 1-octanol                                                                                                                                |                 | X     |      |                   |
| 1-pentadecanol                                                                                                                           |                 | X     |      |                   |
| 1-terpinen-4-ol                                                                                                                          | X               |       |      |                   |
| 1,2,3,4-tetrahydro-1,6-dimethyl-4(1-methylethyl)-(1S-cis)- naphthalene                                                                   |                 |       | X    |                   |
| 1,6-dimethyl-4-(1-methylethyl)-naphthalene, 4-(1,4,5,7-tetramethyl-pyrrolo[3,4-d]pyridazin-6-yl)-phenylamine                             |                 |       | X    |                   |
| 1,8-cineole                                                                                                                              | X               |       |      |                   |
| 13-caryophyllene                                                                                                                         |                 |       | X    |                   |
| 13-ethyl-3-hydroxy-(14 $\beta$ )-gona-1,3,5,7,9-pentaen-17-ketone                                                                        |                 |       | X    |                   |
| 14-hydroxy-9-epi-E-caryophyllene                                                                                                         |                 | X     |      |                   |
| 14-hydroxy-Z-caryophyllene                                                                                                               |                 | X     |      |                   |
| 14-hydroxy- $\alpha$ -humulene                                                                                                           |                 |       | X    |                   |
| 14-hydroxy- $\alpha$ -muurolene                                                                                                          |                 | X     |      |                   |
| 14-hydroxy- $\delta$ -cadinene                                                                                                           |                 | X     |      |                   |
| 2-hydroxyobovaaldehyde                                                                                                                   |                 | X     |      |                   |
| 2-isopropyl-5-methyl-Anisole                                                                                                             | X               |       |      |                   |
| 2-methyl butyl 2-methylbutyrate                                                                                                          |                 | X     |      |                   |
| 2-methylbutyl isovalerate                                                                                                                |                 | X     |      |                   |
| 2-pentadecanone                                                                                                                          |                 | X     |      |                   |
| 2,3-dihydroxy-anti-oleic acid ester                                                                                                      |                 |       | X    |                   |
| 2,4-di-tertbutylphenol                                                                                                                   |                 |       | X    |                   |
| 3-carene                                                                                                                                 | X               |       |      |                   |
| 3',5-diallyl-[1,1'-biphenyl]-2,4'-diol                                                                                                   |                 | X     |      |                   |

|                                                        |   |   |   |   |
|--------------------------------------------------------|---|---|---|---|
| 4-(2-propenyl)-phenol                                  |   |   | X |   |
| 4-benzoyloxybenzoic acid                               | X |   |   |   |
| 4-carene                                               | X |   |   |   |
| 4-coumaric acid                                        | X |   |   |   |
| 4-O-demethylkadsurenim M                               |   | X |   |   |
| 4-O-metil-honokiol                                     |   |   | X |   |
| 4-pydroxybenzoic acid                                  | X |   |   |   |
| 4'-methoxymagnaldehyde B                               |   | X |   |   |
| 5,5'-Di-2-propenyl-3-methoxy-[1,1'-biphenyl]-2,2'-diol |   |   | X |   |
| 5,5'-diallyl-[1,1'-biphenyl]-2,2'-diol                 |   | X |   |   |
| 5,5'-diallyl-2'-methoxy-[1,1'-biphenyl]-2-ol           |   | X |   |   |
| 6,9,12,15-docosatetraenoic acid methyl ester           |   |   | X |   |
| 7-epi-virolin                                          |   | X |   |   |
| 8-cedren-8-ol                                          |   |   | X |   |
| 9-methoxyobovitol                                      |   | X |   |   |
| 9-oxofarnesol                                          | X |   |   |   |
| acoradiene                                             |   |   |   | X |
| acuminatin                                             |   | X |   |   |
| allo-aromadendrene epoxide                             |   |   | X |   |
| amorpha-4,9-dien-14-al                                 |   | X |   |   |
| amorpha-4,9-dien-2-ol                                  |   | X |   |   |
| androsta-1,4,6-triene-3,17-diketone                    |   |   | X |   |
| ar-curcumene                                           |   | X |   |   |
| aristolone                                             |   | X |   |   |
| aromadendrene oxide                                    | X |   |   |   |
| artemesia alcohol                                      |   |   |   | X |
| astragali                                              | X |   |   |   |
| behenic acid                                           |   |   | X |   |
| benzyl benzoate                                        | X |   |   |   |
| benzyl hexanoate                                       | X |   |   | X |
| bicyclogermacrene                                      |   | X |   |   |
| borneol                                                | X |   |   |   |
| bornyl acetate                                         | X | X |   |   |
| butyl heptanoate                                       |   | X |   |   |
| butyl-2-methylbutyrate                                 |   | X |   |   |
| cadalene                                               |   | X |   |   |
| cadina-1,4-diene                                       |   | X |   |   |
| calamenene                                             | X | X |   |   |
| camphene                                               | X | X |   |   |
| camphor                                                | X |   |   |   |
| carissone                                              |   | X |   |   |
| caryophylladienol I                                    | X |   |   |   |
| caryophyllene oxide                                    | X | X |   |   |
| caryophyllenol I                                       | X |   |   |   |
| chavicol                                               |   | X |   |   |
| chlorogenic acid                                       | X |   |   |   |
| cis-11-eicosenoic acid                                 | X |   |   | X |
| cis-4-thujanol                                         | X |   |   | X |
| cis-nerolidol                                          |   |   | X |   |
| cis- $\beta$ -farnesene                                |   |   |   | X |

|                                   |   |   |   |   |
|-----------------------------------|---|---|---|---|
| cis- $\beta$ -ocimene             | X |   |   | X |
| copaene                           |   |   |   | X |
| costunolide                       | X |   |   |   |
| crassifolioside                   |   | X |   |   |
| cyclocolorenone                   |   | X | X |   |
| dehydrosaussurea lactone          |   |   | X |   |
| E-caryophyllene                   |   | X | X |   |
| E-nerolidyl acetate               |   | X |   |   |
| eicosanoic acid                   | X |   |   | X |
| ent-espatulenol                   |   |   | X |   |
| ethyl 2-methylbutyrate            |   | X |   |   |
| ethyl hexadecanoate               |   | X |   |   |
| ethyl palmitate                   |   |   | X |   |
| eucalyptol                        | X | X | X |   |
| eudesm-7(11)-en-4-ol              |   |   | X |   |
| eudesma-4(14),11- diene           | X |   |   |   |
| eugenol                           |   | X |   |   |
| farnesene                         | X |   |   |   |
| fenchone                          |   | X |   |   |
| galgravin                         |   |   | X |   |
| geranic acid                      |   |   | X |   |
| geranyl acetone                   |   | X |   |   |
| germacrene B                      |   | X | X |   |
| germacrene D                      | X | X | X |   |
| germacrene-D-4-ol                 |   |   | X |   |
| globulol                          | X | X |   |   |
| grandifloralignan                 |   |   | X |   |
| guaia-6,10(14)-dien-4 $\beta$ -ol | X |   |   |   |
| guaiol                            | X | X |   | X |
| helifolenol A                     |   |   | X |   |
| heneicosanoic acid                | X |   |   | X |
| heptadecane                       |   | X |   |   |
| heptadecanoic acid                | X |   |   | X |
| hesperidin                        | X |   |   |   |
| hexadecanoic acid                 | X | X | X | X |
| hexadecenoic acid                 | X |   |   | X |
| honokiol                          |   | X | X |   |
| humulene epoxide-II               | X | X |   |   |
| isobicyclogermacrenal             |   |   | X |   |
| isobicyclogermacrenal             |   | X |   |   |
| isobutyl 2-methylbutyrate         |   | X |   |   |
| isobutyl 3-methylbutyrate         |   | X |   |   |
| isobutyl isobutyrate              |   | X |   |   |
| isoledene                         |   | X |   | X |
| isomagnolol                       |   | X |   |   |
| isoobovatol                       |   | X |   |   |
| isovalerate isobutyl              |   |   | X |   |
| kadsurenin M                      |   | X |   |   |
| khusilal                          |   | X |   |   |
| khusinol acetate                  |   | X |   |   |
| lanuginosine                      |   | X |   |   |
| licarin A                         |   | X |   |   |
| limonene                          | X | X | X |   |

|                                                                                       |   |   |   |   |
|---------------------------------------------------------------------------------------|---|---|---|---|
| linalool                                                                              | X | X |   |   |
| linoleic acid                                                                         | X | X | X | X |
| longipinocarvona                                                                      |   |   | X |   |
| lysicamine                                                                            |   | X |   |   |
| magnaldehyde B                                                                        |   | X |   |   |
| magnobovatol                                                                          |   | X |   |   |
| magnolol                                                                              |   | X | X |   |
| magnoloside A                                                                         |   | X |   |   |
| magnoloside F                                                                         |   | X |   |   |
| magnoloside G                                                                         |   | X |   |   |
| magnoloside H                                                                         |   | X |   |   |
| magnoloside Ia                                                                        |   | X |   |   |
| magnoloside Ib                                                                        |   | X |   |   |
| magnoloside Ic                                                                        |   | X |   |   |
| magnoloside IIa                                                                       |   | X |   |   |
| magnoloside IIb                                                                       |   | X |   |   |
| magnoloside IIIa                                                                      |   | X |   |   |
| magnoloside IVa                                                                       |   | X |   |   |
| magnoloside V                                                                         |   | X |   |   |
| magnoquinone                                                                          |   | X |   |   |
| magnotriol B                                                                          |   | X |   |   |
| magnovatin A                                                                          |   | X |   |   |
| magnovatin B                                                                          |   | X |   |   |
| methyl caffeate                                                                       |   | X |   |   |
| methyl chavicol                                                                       |   | X |   |   |
| methyl hexadecanoate                                                                  |   | X |   |   |
| methyl linoleate                                                                      |   | X |   |   |
| methyl linolelaidate                                                                  |   |   | X |   |
| methyl oleate                                                                         |   | X |   |   |
| mexicanin                                                                             | X |   |   |   |
| michelenolide                                                                         |   | X |   |   |
| mustakone                                                                             |   | X |   |   |
| myrcene                                                                               |   | X |   |   |
| myrtenal                                                                              | X |   |   |   |
| myrtenol                                                                              | X |   |   |   |
| N-(6-Oxo-9,10,11,12-tetrahydro-6H-5-oxa-8-aza-benzo[C] phenanthren-7-yl)-propionamide |   |   | X |   |
| n-hexadecane                                                                          |   |   | X |   |
| naphtalene                                                                            |   | X |   |   |
| neryl propanoate                                                                      |   | X |   |   |
| nerolidol                                                                             |   |   | X |   |
| O-methylmoschatoline                                                                  |   | X |   |   |
| obovaaldehyde                                                                         |   | X |   |   |
| obovatal                                                                              |   | X |   |   |
| obovatalignan A                                                                       |   | X |   |   |
| obovatalignan B                                                                       |   | X |   |   |
| obovatalignan C                                                                       |   | X |   |   |
| obovatalignan D                                                                       |   | X |   |   |
| obovatalignan E                                                                       |   | X |   |   |
| obovatalignan F                                                                       |   | X |   |   |
| obovatalignan G                                                                       |   | X |   |   |
| obovatalignan H                                                                       |   | X |   |   |

|                                     |   |   |   |   |
|-------------------------------------|---|---|---|---|
| obovatalignan I                     |   | X |   |   |
| obovatol                            |   | X |   |   |
| obovatoside A                       |   | X |   |   |
| obovatoside B                       |   | X |   |   |
| obovatoside C                       |   | X |   |   |
| octadecanoic acid                   | X |   |   | X |
| octadecenoic acid                   | X |   |   | X |
| oleiferin A                         |   | X |   |   |
| oleiferin C                         |   | X |   |   |
| <i>p</i> -cymen-8-ol                | X |   |   |   |
| <i>p</i> -cymene                    | X | X | X |   |
| <i>p</i> -menth-1-ene               | X |   |   |   |
| <i>p</i> -menth-2-ene               |   |   |   | X |
| palmitic acid                       |   |   | X |   |
| parthenolide                        | X | X |   |   |
| pavonisol                           |   | X |   |   |
| pentadecanoic acid                  | X |   |   | X |
| perillyl alcohol                    | X |   |   |   |
| perillene                           |   | X |   |   |
| pinocarvone                         | X |   |   |   |
| propyl 2-methylbutyrate             |   | X |   |   |
| protocatechuic acid                 | X |   |   |   |
| quercetin                           | X |   |   |   |
| rutin                               | X |   |   |   |
| salvial-4(14)-en-1-one              |   | X |   |   |
| scopoletin                          | X |   |   |   |
| scopolin                            | X |   |   |   |
| selin-11-en-4 $\alpha$ -ol          | X |   |   |   |
| sesquisabinene                      |   | X |   |   |
| spathulenol                         |   | X |   |   |
| syringin                            |   | X |   |   |
| terpenene-4-ol                      | X |   |   |   |
| terpinen-4-ol                       | X | X | X |   |
| terpinolene                         | X |   |   | X |
| tetradecanoic acid                  |   |   | X |   |
| <i>trans</i> -nerolidol             | X |   | X |   |
| <i>trans</i> -pinocarveol           | X |   |   |   |
| <i>trans</i> -pinocarvyl acetate    | X |   |   |   |
| <i>trans</i> - $\beta$ -bergamotene | X | X |   |   |
| <i>trans</i> - $\beta$ -guaiene     |   | X |   |   |
| tripetalin A                        |   | X |   |   |
| tripetalin B                        |   | X |   |   |
| vanillic acid                       | X |   |   |   |
| vanillin                            | X |   |   |   |
| veraguensin                         |   |   | X |   |
| verbenone                           | X |   |   |   |
| $\alpha$ -acorenenol                |   | X |   |   |
| $\alpha$ -bergamotene               |   |   | X |   |
| $\alpha$ -cadinol                   | X | X | X |   |
| $\alpha$ -calacorene                | X | X |   |   |
| $\alpha$ -caryophyllene             |   |   | X |   |
| $\alpha$ -copaene                   | X | X |   |   |
| $\alpha$ -cubebene                  |   | X |   |   |

|                                      |   |   |   |   |
|--------------------------------------|---|---|---|---|
| $\alpha$ -elemene                    | X |   |   |   |
| $\alpha$ -eudesmol                   |   | X |   |   |
| $\alpha$ -gurjunene                  |   |   | X |   |
| $\alpha$ -humulene                   | X | X | X |   |
| $\alpha$ -muurolene                  | X | X |   |   |
| $\alpha$ -myrcene                    | X |   |   |   |
| $\alpha$ -phellandrene               | X | X |   | X |
| $\alpha$ -pinene                     | X | X | X | X |
| $\alpha$ -selinene                   | X | X | X |   |
| $\alpha$ -terpinene                  | X |   | X | X |
| $\alpha$ -terpineol                  | X | X | X | X |
| $\alpha$ -thujene                    |   | X |   |   |
| $\alpha$ -trans-bergamotene          |   | X |   |   |
| $\alpha$ -ylangene                   |   | X |   |   |
| $\alpha$ , <i>p</i> -dimethylstyrene | X |   |   |   |
| $\beta$ -bisabolene                  |   | X |   | X |
| $\beta$ -caryophyllene               | X | X | X |   |
| $\beta$ -cedren-9-one                |   |   | X |   |
| $\beta$ -cubebene                    |   | X |   |   |
| $\beta$ -elemene                     | X | X | X |   |
| $\beta$ -eudesmol                    |   | X |   |   |
| $\beta$ -linalool                    | X |   |   | X |
| $\beta$ -myrcene                     | X |   |   | X |
| $\beta$ -phellandrene                |   | X |   | X |
| $\beta$ -pinene                      | X | X | X |   |
| $\beta$ -selinene                    | X | X |   |   |
| $\gamma$ -cadinene                   | X | X |   |   |
| $\gamma$ -elemene                    |   | X |   |   |
| $\gamma$ -muurolene                  | X | X |   |   |
| $\gamma$ -terpinene                  | X |   | X | X |
| $\delta$ -cadinene                   | X | X | X | X |
| $\tau$ -cadinol                      | X | X |   |   |
| $\tau$ -muurolol                     | X | X | X |   |

---
